# Supplementary material for: Nickel hydroxide/sulfide hybrids: halide ion controlled synthesis, structural characteristics, and electrochemical performance
Source: Royal Society of Chemistry journal article supplement (doi:10.1039/d1dt04206h), 2022-01-01
Supplement: d1dt04206h1.pdf [file d1dt04206h1.pdf]

# **Nickel Hydroxide/Sulfide Hybrids: Halide Ion Controlled Synthesis, Structural Characteristics, and Electrochemical Performance**

Qibin Wu,<sup>a,c</sup> Weining Li,<sup>a</sup> Xuefeng Zou,<sup>\*b</sup> Bin Xiang<sup>\*a</sup>

<sup>a</sup>Chemistry and Chemical Engineering, Chongqing University, Chongqing 400044, China.

<sup>b</sup>Guizhou Provincial Key Laboratory of Computational Nano-Material Science, Guizhou Education University, Guiyang 550018, China.

<sup>c</sup>State Key Laboratory of Advanced Chemical Power Sources, Guizhou Meiling Power Sources Co. Ltd., Zunyi, Guizhou 563003, China.

\*Corresponding Author.

E-mail: njzouxf@gznc.edu.cn (X. Zou), xiangbin@cqu.edu.cn (B. Xiang)

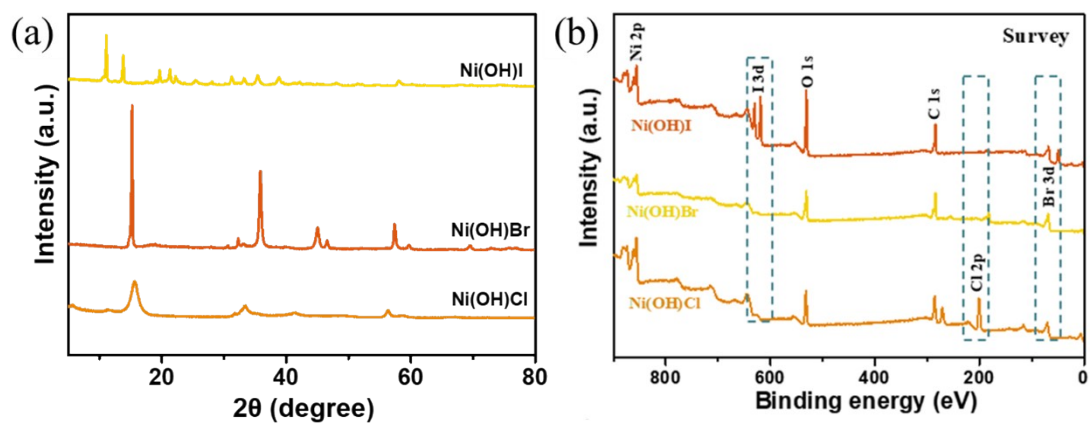

**Figure S1.** (a) XRD patterns of Ni(OH)Cl, Ni(OH)Br and Ni(OH)I. (b) XPS spectra of Ni(OH)Cl, Ni(OH)Br and Ni(OH)I.

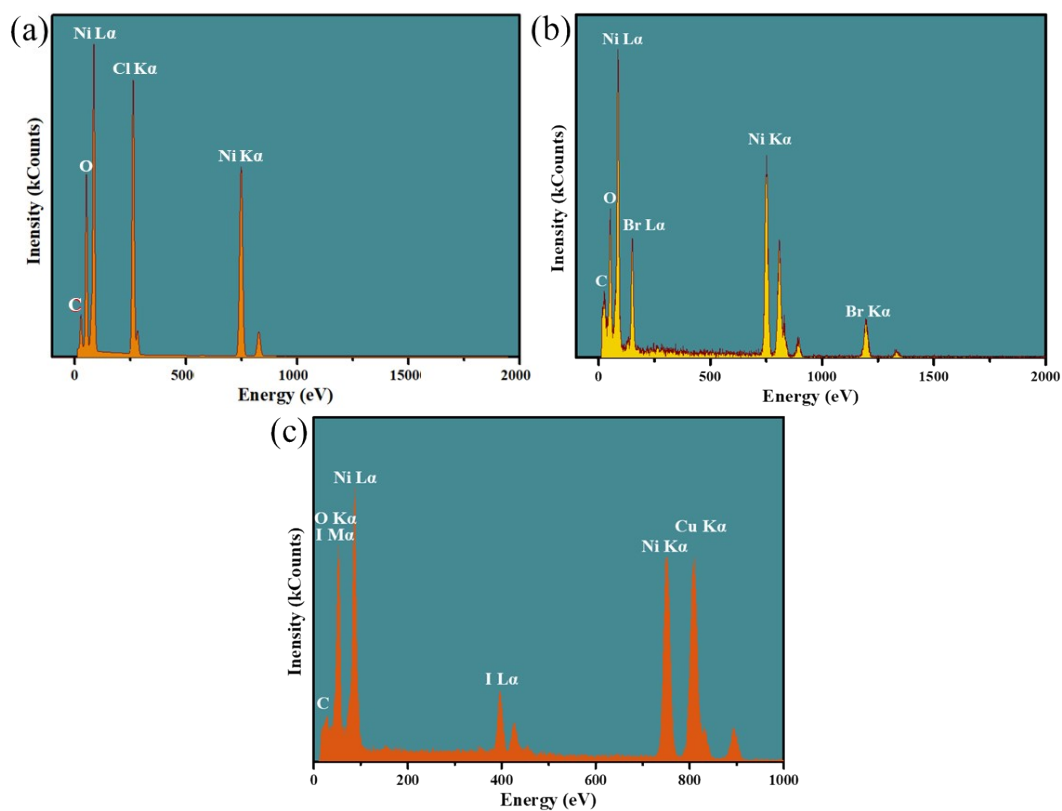

**Figure S2.** EDS spectra of (a) Ni(OH)Cl, (b) Ni(OH)Br, and (c) Ni(OH)I.

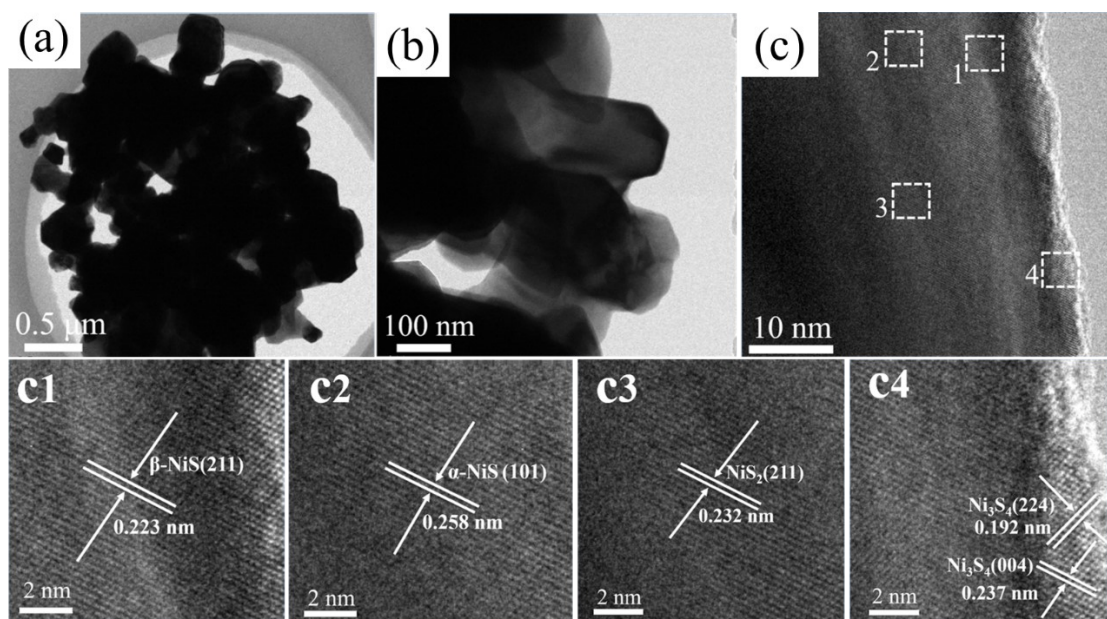

**Figure S3.** TEM images of S1.

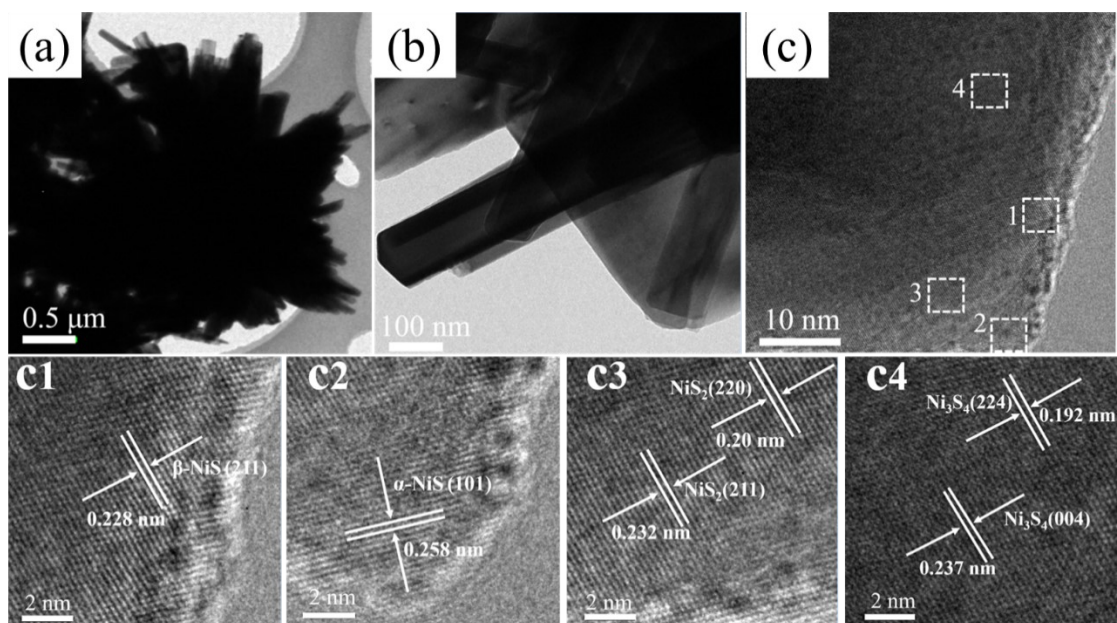

**Figure S4.** TEM images of S2.

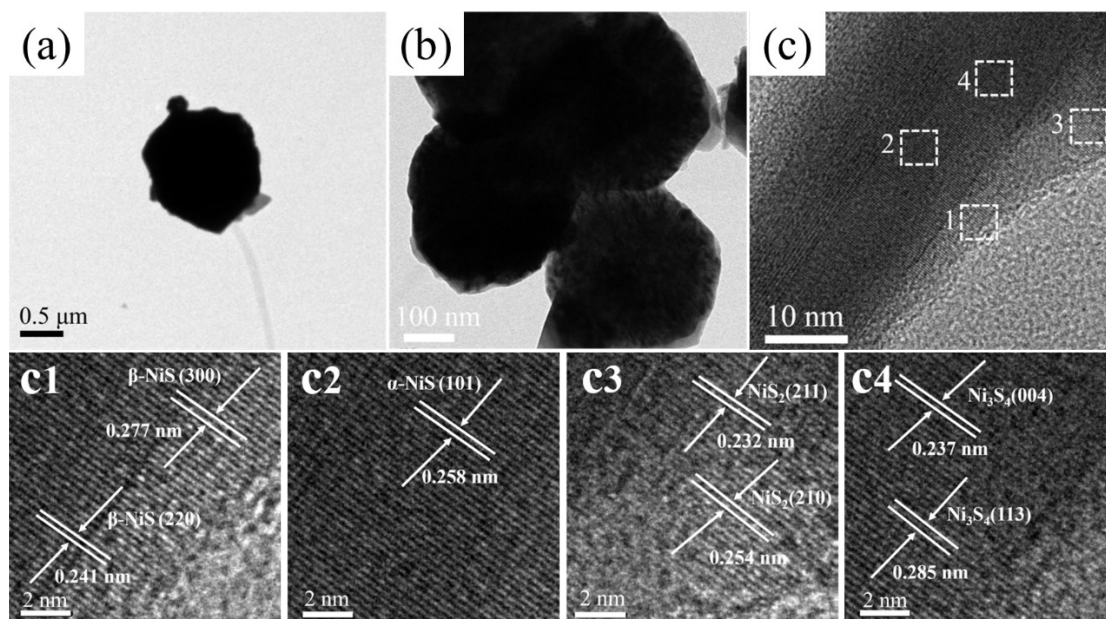

Figure S5. TEM images of S3.

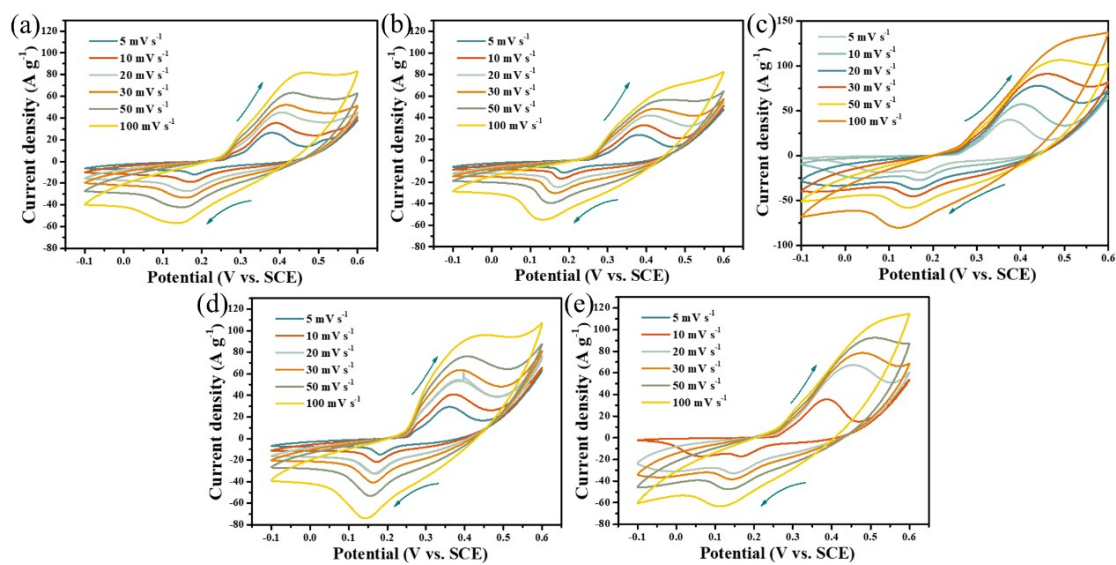

Figure S6. (a-e) CV curves of NS-1h, NS-3h, NS-6h, NS-12h, and NS-20h at different scan rates, successively.



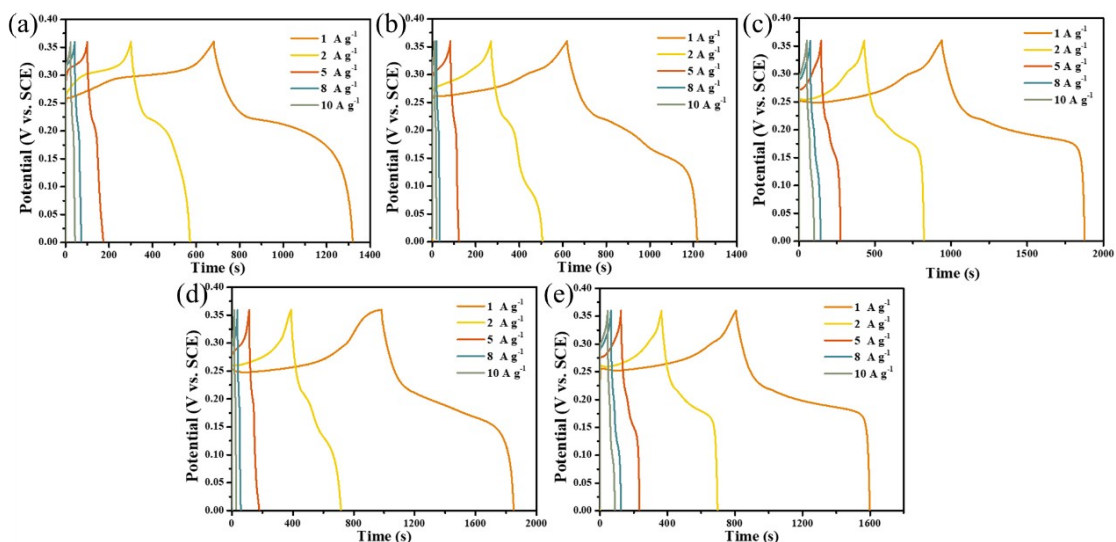

Figure S7. (a-e) GCD curves of NS-1h, NS-3h, NS-6h, NS-12h, and NS-20h at different scan rates.

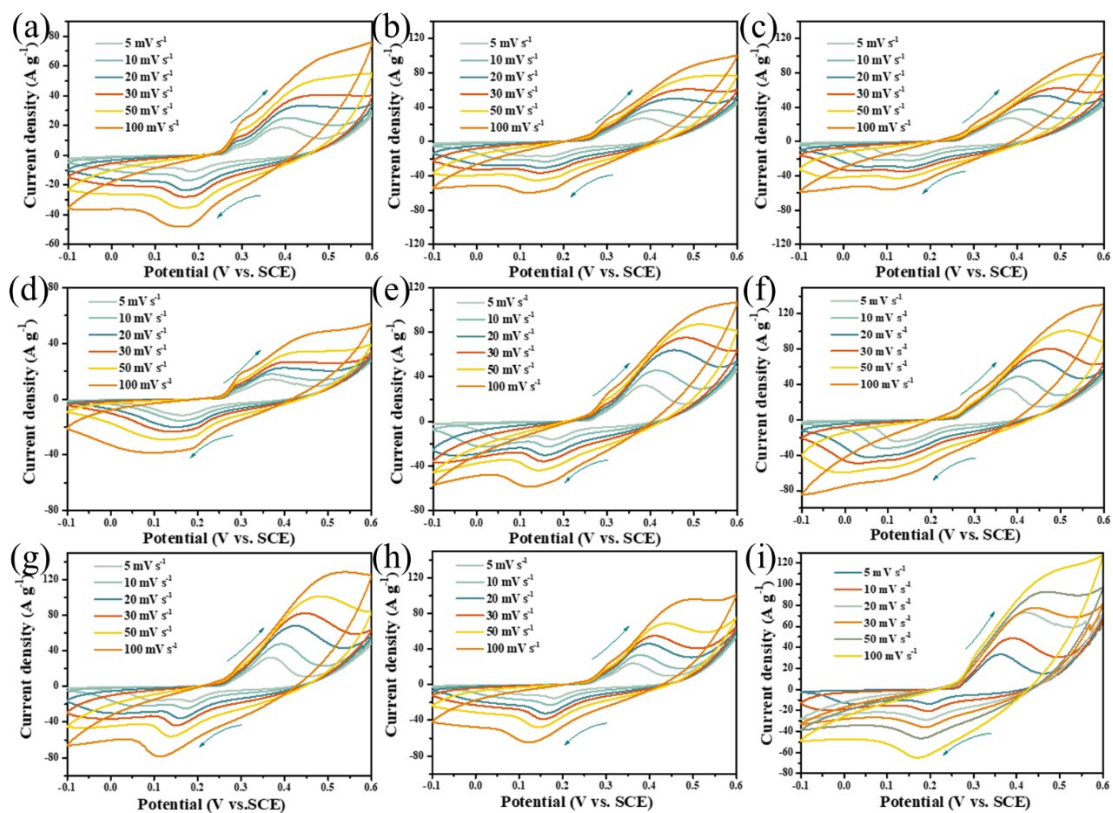

Figure S8. CV curves of N-1 to N-9.

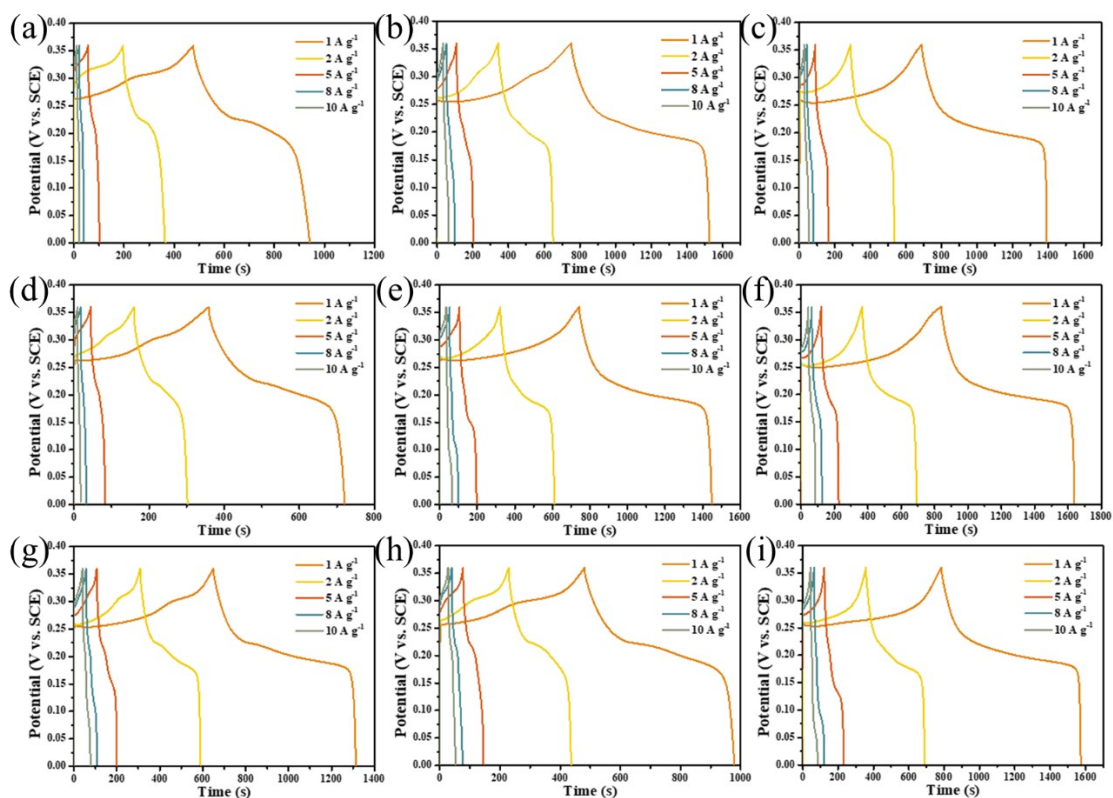

Figure S9. GCD curves of N-1 to N-9.

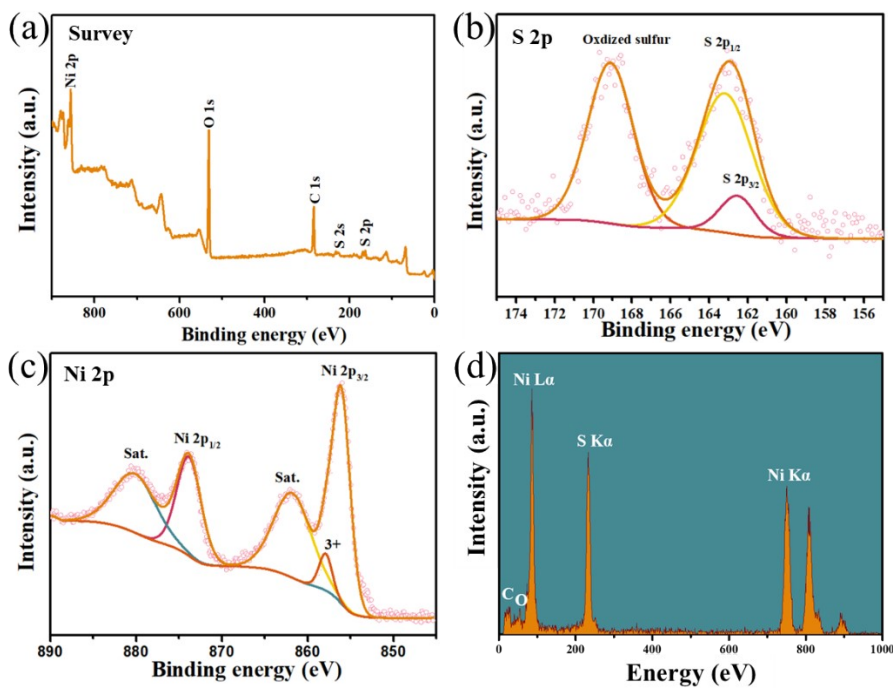

Figure S10. (a) Survey XPS spectrum of NCS. (b) S2p XPS spectrum of NCS. (c) Ni2p XPS spectrum of NCS. (d) EDS spectrum of NCS.

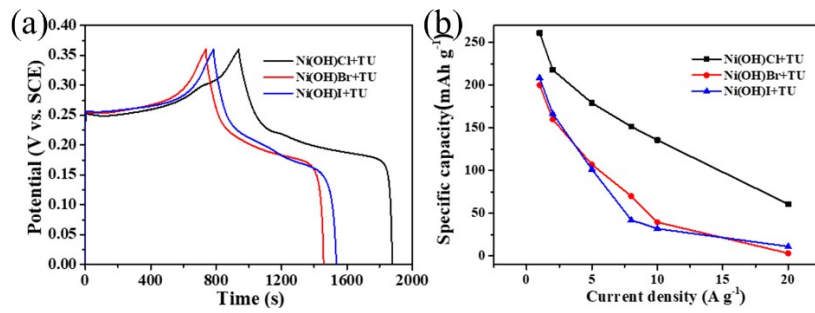

**Figure S11.** (a) GCD curves of NCS, NBS, and NIS. (b) Specific capacities of NCS, NBS, and NIS at diverse current densities.

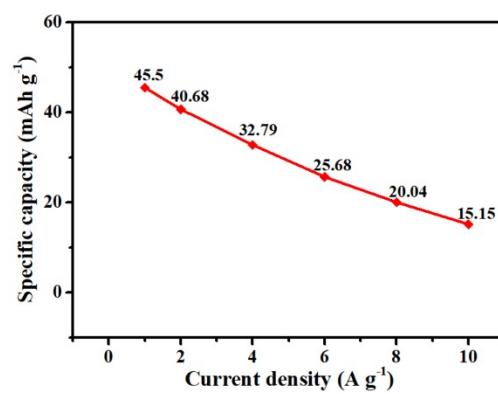

**Figure S12.** Specific capacities of the fabricated supercapacitor at different current densities.

**Table S1.** L9(3<sup>4</sup>) orthogonal experimental data.

| No.             | Col.<br>t (h)                                | A<br>T (°C) | B<br>- | C<br>n(Ni(OH)Cl)/n(TU) | D<br>C <sub>m</sub><br>mAh·g <sup>-1</sup> |
|-----------------|----------------------------------------------|-------------|--------|------------------------|--------------------------------------------|
| 1               | 1(6)                                         | 1(120)      | 1      | 1(0.15)                | 129.5                                      |
| 2               | 1                                            | 2(160)      | 2      | 2(0.3)                 | 214                                        |
| 3               | 1                                            | 3(200)      | 3      | 3(1)                   | 196.3                                      |
| 4               | 2(12)                                        | 1           | 2      | 3                      | 100.7                                      |
| 5               | 2                                            | 2           | 3      | 1                      | 196.1                                      |
| 6               | 2                                            | 3           | 1      | 2                      | 222.4                                      |
| 7               | 3(20)                                        | 1           | 3      | 2                      | 184.5                                      |
| 8               | 3                                            | 2           | 1      | 3                      | 138.3                                      |
| 9               | 3                                            | 3           | 2      | 1                      | 220.7                                      |
| K <sub>1j</sub> | 539.8                                        | 414.7       | -      | 546.3                  | -                                          |
| K <sub>2j</sub> | 519.2                                        | 548.4       | -      | 620.9                  | -                                          |
| K <sub>3j</sub> | 543.5                                        | 639.4       | -      | 435.3                  | -                                          |
| k <sub>1j</sub> | 179.9                                        | 138.2       | -      | 182.1                  | -                                          |
| k <sub>2j</sub> | 173.1                                        | 182.8       | -      | 207.0                  | -                                          |
| k <sub>3j</sub> | 181.2                                        | 213.1       | -      | 145.1                  | -                                          |
| R               | 8.1                                          | 74.9        | -      | 61.9                   | -                                          |
| Factor Order    | T > n(Ni(OH)Cl)/n(TU) > t                    |             |        |                        |                                            |
| Optimal Scheme  | B <sub>3</sub> C <sub>2</sub> A <sub>3</sub> |             |        |                        |                                            |



**Table S2.** Quantitative analysis of S1, S2, and S3 by XRD data.

| Sample | Phase                   | Weight Percentage (%) |
|--------|-------------------------|-----------------------|
| S1     | $\beta$ -NiS            | 66.1                  |
|        | $\text{Ni}_3\text{S}_4$ | 23.5                  |
|        | $\alpha$ -NiS           | 8.2                   |
|        | $\text{NiS}_2$          | 2.2                   |
| S2     | $\beta$ -NiS            | 75.6                  |
|        | $\text{Ni}_3\text{S}_4$ | 15.6                  |
|        | $\alpha$ -NiS           | 5.7                   |
|        | $\text{NiS}_2$          | 3.1                   |
| S3     | $\beta$ -NiS            | 67.7                  |
|        | $\text{Ni}_3\text{S}_4$ | 16.6                  |
|        | $\alpha$ -NiS           | 7.4                   |
|        | $\text{NiS}_2$          | 8.3                   |

**Table S3.** A comparison of the specific capacity of nickel-based materials reported previously.

| Sample                                                                                 | Capacity<br>(mAh·g <sup>-1</sup> ) | Current<br>density<br>(A·g <sup>-1</sup> ) | Electrolyte | Ref.      |
|----------------------------------------------------------------------------------------|------------------------------------|--------------------------------------------|-------------|-----------|
| 5-NiS@CoS                                                                              | 168.1                              | 1                                          | 2 M KOH     | 1         |
| NiS-C                                                                                  | 168.3                              | 0.5                                        | 3 M KOH     | 2         |
| NiCo <sub>2</sub> S <sub>4</sub> /Co <sub>9</sub> S <sub>8</sub> hollow<br>nanospheres | 126.0                              | 1                                          | 1 M KOH     | 3         |
| NiS nanostructures                                                                     | 120.5                              | 1                                          | 2 M KOH     | 4         |
| NiS hierarchical hollow cubes                                                          | 133.6                              | 1                                          | 2 M KOH     | 5         |
| RHAC/NiCo <sub>2</sub> S <sub>4</sub>                                                  | 233.3                              | 1                                          | 2 M KOH     | 6         |
| Ni <sub>3</sub> S <sub>4</sub> @rGO                                                    | 203.3                              | 2                                          | 2 M KOH     | 7         |
| NiS/NiO                                                                                | 118.1                              | 2                                          | 2 M KOH     | 8         |
| NiS/NTA-2                                                                              | 191.3                              | 1                                          | 2 M KOH     | 9         |
| NiS@C QDs-CNTs-rGO                                                                     | 241.0                              | 1                                          | 1 M KOH     | 10        |
| Ni <sub>3</sub> S <sub>4</sub> -NiS/rGO                                                | 219.2                              | 1                                          | 2 M KOH     | 11        |
| H-NiS <sub>1-x</sub> /C-50                                                             | 216.0                              | 1                                          | 6 M KOH     | 12        |
| R-NiS/rGO                                                                              | 206.6                              | 1                                          | 2 M KOH     | 13        |
| C@MoS <sub>2</sub> /Ni <sub>3</sub> S <sub>4</sub>                                     | 132.1                              | 2                                          | 2 M KOH     | 14        |
| Ni <sub>1-x</sub> Co <sub>2-x</sub> S/Co(OH) <sub>2</sub>                              | 195.1                              | 1                                          | 3 M KOH     | 15        |
| Cu-doped Ni <sub>3</sub> S <sub>2</sub>                                                | 105.9                              | 1                                          | 3 M KOH     | 16        |
| Ni <sub>3</sub> S <sub>4</sub> -MoS <sub>2</sub>                                       | 136.8                              | 1                                          | 3 M KOH     | 17        |
| pyrite NiS <sub>2</sub> nanoparticles                                                  | 163.9                              | 2                                          | 6 M KOH     | 18        |
| β-NiS@Ni                                                                               | 191.1                              | 2                                          | 1 M KOH     | 19        |
| NCS                                                                                    | 261.2                              | 1                                          | 2 M KOH     | This work |

**Table S4.** A comparison of some supercapacitors reported previously.

| ECs                                                                                        | Energy density<br>(Wh·kg <sup>-1</sup> ) | Power density<br>(W·kg <sup>-1</sup> ) | Ref.      |
|--------------------------------------------------------------------------------------------|------------------------------------------|----------------------------------------|-----------|
| 5-NiS@CoS//AC                                                                              | 24.1                                     | 752.15                                 | 1         |
| NiS-C//AC                                                                                  | 35.07                                    | 420.0                                  | 2         |
| NiCo <sub>2</sub> S <sub>4</sub> /Co <sub>9</sub> S <sub>8</sub> hollow<br>nanospheres//AC | 36.7                                     | 800.0                                  | 3         |
| NiS nanostructures//AC                                                                     | 16.5                                     | 250.0                                  | 4         |
| NiS hierarchical hollow<br>cubes//AC                                                       | 34.9                                     | 387.5                                  | 5         |
| RHAC/NiCo <sub>2</sub> S <sub>4</sub> /RHAC                                                | 41.6                                     | 150.0                                  | 6         |
| Ni <sub>3</sub> S <sub>4</sub> @rGO//AC                                                    | 37.3                                     | 398                                    | 7         |
| NiS/NTA-2//AC                                                                              | 30.8                                     | 4187.2                                 | 9         |
| NiS@C QDs-CNTs-<br>rGO//Graphene                                                           | 21.0                                     | 811                                    | 10        |
| H-NiS <sub>1-x</sub> /C-50//AC                                                             | 36.88                                    | 750                                    | 12        |
| Ni <sub>1</sub> -Co <sub>2</sub> -S/Co(OH) <sub>2</sub> //AC                               | 48.8                                     | 800                                    | 15        |
| Cu-doped Ni <sub>3</sub> S <sub>2</sub> //AC                                               | 33.7                                     | 850.1                                  | 16        |
| Ni <sub>3</sub> S <sub>4</sub> -MoS <sub>2</sub> //AC                                      | 58.43                                    | 385.95                                 | 17        |
| pyrite NiS <sub>2</sub> nanoparticles//AC                                                  | 54.2                                     | 940.0                                  | 18        |
| β-NiS@Ni//AC                                                                               | 40.0                                     | 720.0                                  | 19        |
| NCS//rGO                                                                                   | 36.4                                     | 800.0                                  | This work |

## References

1. Miao, Y.; Zhang, X.; Zhan, J.; Sui, Y.; Qi, J.; Wei, F.; Meng, Q.; He, Y.; Ren, Y.; Zhan, Z.; Sun, Z., Hierarchical NiS@CoS with controllable core-shell structure by two-step strategy for supercapacitor electrodes. *Advanced Materials Interfaces* **2020**, *7* (3), 1901618.
2. Harish, S.; Naveen, A. N.; Abinaya, R.; Archana, J.; Ramesh, R.; Navaneethan, M.; Shimomura, M.; Hayakawa, Y., Enhanced performance on capacity retention of hierarchical NiS hexagonal nanoplate for highly stable asymmetric supercapacitor. *Electrochimica Acta* **2018**, *283*, 1053-1062.
3. Shen, Y.; Zhang, K.; Chen, B.; Yang, F.; Xu, K.; Lu, X., Enhancing the electrochemical performance of nickel cobalt sulfides hollow nanospheres by structural modulation for asymmetric supercapacitors. *Journal of Colloid and Interface Science* **2019**, *557*, 135-143.
4. Nandhini, S.; Muralidharan, G., Facile microwave-hydrothermal synthesis of NiS nanostructures for supercapacitor applications. *Applied Surface Science* **2018**, *449*, 485-491.
5. Ma, X.; Zhang, L.; Xu, G.; Zhang, C.; Song, H.; He, Y.; Zhang, C.; Jia, D., Facile synthesis of NiS hierarchical hollow cubes via Ni formate frameworks for high performance supercapacitors. *Chemical Engineering Journal* **2017**, *320*, 22-28.
6. Wang, H.; Wu, D.; Zhou, J., Gasified rice husk based RHAC/NiCo<sub>2</sub>S<sub>4</sub> composite for high performance asymmetric supercapacitor. *Journal of Alloys and Compounds* **2019**, *811*, 152073.
7. Hu, Q.; Zou, X.; Huang, Y.; Wei, Y.; YaWang; Chen, F.; Xiang, B.; Wu, Q.; Li, W., Graphene oxide-driven transformation of NiS/Ni<sub>3</sub>S<sub>4</sub> microbars towards Ni<sub>3</sub>S<sub>4</sub> polyhedrons for supercapacitor. *Journal of Colloid and Interface Science* **2020**, *559*, 115-123.
8. Wang, Y.; Pan, A.; Zhang, Y.; Shi, J.; Lin, J.; Liang, S.; Cao, G., Heterogeneous NiS/NiO multi-shelled hollow microspheres with enhanced electrochemical performances for hybrid-type asymmetric supercapacitors. *Journal of Materials*

*Chemistry A* **2018**, *6* (19), 9153-9160.

9. Wu, D.; Xie, X.; Ma, Y.; Zhang, J.; Hou, C.; Sun, X.; Yang, X.; Zhang, Y.; Kimura, H.; Du, W., Morphology controlled hierarchical NiS/carbon hexahedrons derived from nitrilotriacetic acid-assembly strategy for high-performance hybrid supercapacitors.

*Chemical Engineering Journal* **2021**, 133673.

10. Zhang, R.; Lu, C.; Shi, Z.; Liu, T.; Zhai, T.; Zhou, W., Hexagonal phase NiS octahedrons co-modified by 0D-, 1D-, and 2D carbon materials for high-performance supercapacitor. *Electrochimica Acta* **2019**, *311*, 83-91.

11. Azizi Darsara, S.; Seifi, M.; Askari, M. B.; Osquian, M., Hierarchical 3D starfish-like Ni<sub>3</sub>S<sub>4</sub>-NiS on reduced graphene oxide for high-performance supercapacitors. *Ceramics International* **2021**, *47* (15), 20992-20998.

12. Huang, C.; Gao, A.; Yi, F.; Wang, Y.; Shu, D.; Liang, Y.; Zhu, Z.; Ling, J.; Hao, J., Metal organic framework derived hollow NiS@C with S-vacancies to boost high-performance supercapacitors. *Chemical Engineering Journal* **2021**, *419*, 129643.

13. Qu, C.; Zhang, L.; Meng, W.; Liang, Z.; Zhu, B.; Dang, D.; Dai, S.; Zhao, B.; Tabassum, H.; Gao, S.; Zhang, H.; Guo, W.; Zhao, R.; Huang, X.; Liu, M.; Zou, R., MOF-derived  $\alpha$ -NiS nanorods on graphene as an electrode for high-energy-density supercapacitors. *Journal of Materials Chemistry A* **2018**, *6* (9), 4003-4012.

14. Qin, S.; Yao, T.; Guo, X.; Chen, Q.; Liu, D.; Liu, Q.; Li, Y.; Li, J.; He, D., MoS<sub>2</sub>/Ni<sub>3</sub>S<sub>4</sub> composite nanosheets on interconnected carbon shells as an excellent supercapacitor electrode architecture for long term cycling at high current densities. *Applied Surface Science* **2018**, *440*, 741-747.

15. Xu, T.; Li, G.; Zhao, L., Ni-Co-S/Co(OH)<sub>2</sub> nanocomposite for high energy density all-solid-state asymmetric supercapacitors. *Chemical Engineering Journal* **2018**, *336*, 602-611.

16. Li, G.; Cui, X.; Song, B.; Ouyang, H.; Wang, K.; Sun, Y.; Wang, Y., One-pot synthesis of Cu-doped Ni<sub>3</sub>S<sub>2</sub> nano-sheet/rod nanoarray for high performance supercapacitors. *Chemical Engineering Journal* **2020**, *388*, 124319.

17. Luo, W.; Zhang, G.; Cui, Y.; Sun, Y.; Qin, Q.; Zhang, J.; Zheng, W., One-step extended strategy for the ionic liquid-assisted synthesis of Ni<sub>3</sub>S<sub>4</sub>-MoS<sub>2</sub> heterojunction



electrodes for supercapacitors. *Journal of Materials Chemistry A* **2017**, *5* (22), 11278-11285.

18. Zhang, J.; Zhang, D.; Yang, B.; Shi, H.; Wang, K.; Han, L.; Wang, S.; Wang, Y., Targeted synthesis of NiS and NiS<sub>2</sub> nanoparticles for high-performance hybrid supercapacitor via a facile green solid-phase synthesis route. *Journal of Energy Storage* **2020**, *32*, 101852.

19. Bhagwan, J.; Khaja Hussain, S.; Krishna, B. N. V.; Yu, J. S.,  $\beta$ -NiS 3D micro-flower-based electrode for aqueous asymmetric supercapacitors. *Sustainable Energy & Fuels* **2020**, *4* (11), 5550-5559.
